# Supplementary material
Source: MDPI journal article supplement (https://www.mdpi.com/1999-4907/13/1/126)
Supplement: s1 [file s1]

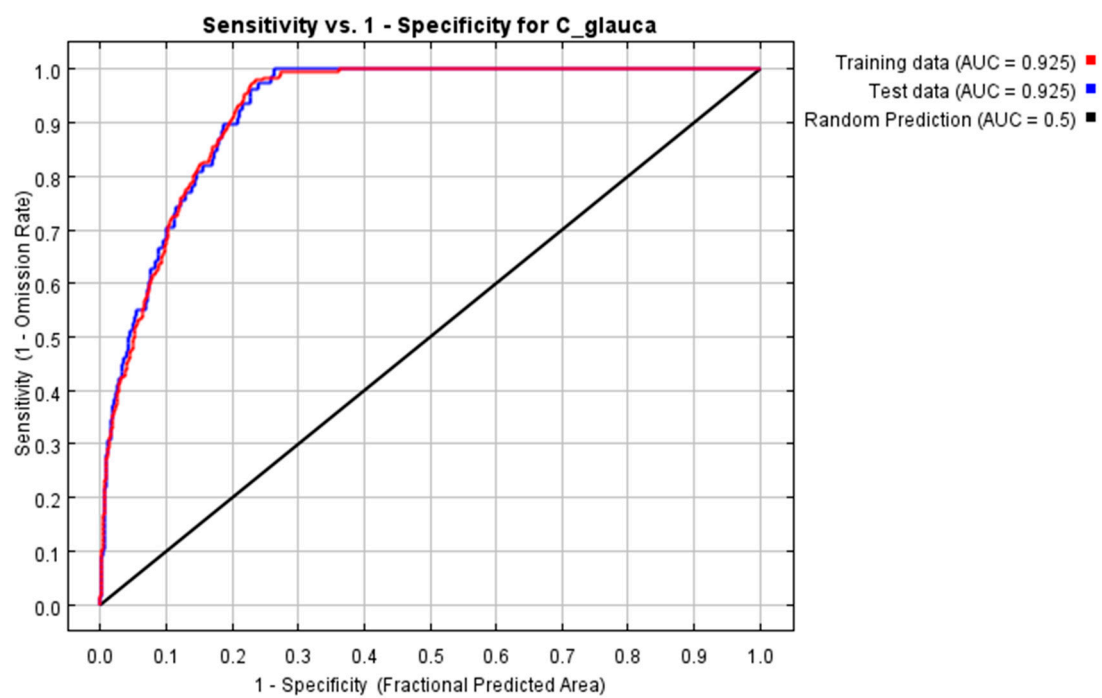

**Figure S1.** The Maxent predicted ROC curve of *C. glauca*.

**Table S1.** Correlation matrix for different environmental variables.

|       | Bio1  | Bio2  | Bio3  | Bio4  | Bio5  | Bio6  | Bio7  | Bio8  | Bio9  | Bio10 | Bio11 | Bio12 | Bio13 | Bio14 | Bio15 | Bio16 | Bio17 | Bio18 | Bio19 |
|-------|-------|-------|-------|-------|-------|-------|-------|-------|-------|-------|-------|-------|-------|-------|-------|-------|-------|-------|-------|
| Bio1  | 1.00  |       |       |       |       |       |       |       |       |       |       |       |       |       |       |       |       |       |       |
| Bio2  | 0.89  | 1.00  |       |       |       |       |       |       |       |       |       |       |       |       |       |       |       |       |       |
| Bio3  | 0.91  | 0.63  | 1.00  |       |       |       |       |       |       |       |       |       |       |       |       |       |       |       |       |
| Bio4  | -0.53 | -0.40 | -0.54 | 1.00  |       |       |       |       |       |       |       |       |       |       |       |       |       |       |       |
| Bio5  | 0.91  | 0.63  | 0.99  | -0.56 | 1.00  |       |       |       |       |       |       |       |       |       |       |       |       |       |       |
| Bio6  | -0.43 | 0.02  | -0.75 | 0.37  | -0.76 | 1.00  |       |       |       |       |       |       |       |       |       |       |       |       |       |
| Bio7  | 0.84  | 0.97  | 0.56  | -0.29 | 0.56  | 0.08  | 1.00  |       |       |       |       |       |       |       |       |       |       |       |       |
| Bio8  | 0.88  | 0.60  | 0.97  | -0.58 | 0.95  | -0.71 | 0.52  | 1.00  |       |       |       |       |       |       |       |       |       |       |       |
| Bio9  | 0.58  | 0.38  | 0.65  | -0.21 | 0.68  | -0.61 | 0.33  | 0.55  | 1.00  |       |       |       |       |       |       |       |       |       |       |
| Bio10 | 0.62  | 0.44  | 0.68  | -0.60 | 0.72  | -0.57 | 0.33  | 0.65  | 0.73  | 1.00  |       |       |       |       |       |       |       |       |       |
| Bio11 | 0.59  | 0.36  | 0.68  | -0.27 | 0.71  | -0.66 | 0.31  | 0.58  | 0.99  | 0.75  | 1.00  |       |       |       |       |       |       |       |       |
| Bio12 | 0.62  | 0.44  | 0.68  | -0.61 | 0.72  | -0.57 | 0.32  | 0.65  | 0.73  | 0.99  | 0.75  | 1.00  |       |       |       |       |       |       |       |
| Bio13 | 0.55  | 0.33  | 0.64  | -0.20 | 0.67  | -0.64 | 0.31  | 0.54  | 0.98  | 0.66  | 0.98  | 0.66  | 1.00  |       |       |       |       |       |       |
| Bio14 | 0.59  | 0.40  | 0.66  | -0.60 | 0.69  | -0.57 | 0.26  | 0.66  | 0.70  | 0.97  | 0.73  | 0.98  | 0.63  | 1.00  |       |       |       |       |       |
| Bio15 | -0.59 | -0.40 | -0.67 | 0.46  | -0.74 | 0.67  | -0.33 | -0.57 | -0.80 | -0.76 | -0.81 | -0.75 | -0.78 | -0.71 | 1.00  |       |       |       |       |
| Bio16 | -0.15 | -0.49 | 0.16  | 0.09  | 0.10  | -0.49 | -0.48 | 0.21  | -0.08 | -0.18 | -0.03 | -0.16 | -0.01 | -0.12 | 0.29  | 1.00  |       |       |       |
| Bio17 | -0.31 | 0.16  | -0.67 | 0.30  | -0.66 | 0.97  | 0.22  | -0.65 | -0.46 | -0.43 | -0.51 | -0.44 | -0.50 | -0.45 | 0.47  | -0.67 | 1.00  |       |       |
| Bio18 | 0.81  | 0.98  | 0.51  | -0.36 | 0.50  | 0.18  | 0.96  | 0.50  | 0.21  | 0.33  | 0.20  | 0.32  | 0.16  | 0.29  | -0.23 | -0.50 | 0.29  | 1.00  |       |
| Bio19 | 0.64  | 0.40  | 0.74  | -0.43 | 0.78  | -0.70 | 0.33  | 0.66  | 0.95  | 0.86  | 0.97  | 0.86  | 0.94  | 0.84  | -0.85 | -0.05 | -0.56 | 0.24  | 1.00  |

**Table S2.** Percent contributions of variables included in Maxent.

| Variable code | Description                         | Unit | Percent contribution (%) |
|---------------|-------------------------------------|------|--------------------------|
| Bio1          | Annual mean temperature             | °C   | –                        |
| Bio2          | Mean Diurnal Range                  | °C   | –                        |
| Bio3          | Isothermality                       | %    | 2                        |
| Bio4          | Temperature Seasonality             |      | –                        |
| Bio5          | Max Temperature of Warmest Month    | °C   | –                        |
| Bio6          | Min Temperature of Coldest Month    | °C   | –                        |
| Bio7          | Temperature Annual Range            | °C   | 10.3                     |
| Bio8          | Mean Temperature of Wettest Quarter | °C   | –                        |
| Bio9          | Mean Temperature of Driest Quarter  | °C   | –                        |
| Bio10         | Mean Temperature of Warmest Quarter | °C   | 1.8                      |
| Bio11         | Mean Temperature of Coldest Quarter | °C   | 5.9                      |
| Bio12         | Annual precipitation                | mm   | 78.9                     |
| Bio13         | Precipitation of Wettest Month      | mm   | –                        |
| Bio14         | Precipitation of Driest Month       | mm   | –                        |
| Bio15         | Precipitation Seasonality           |      | 0.8                      |
| Bio16         | Precipitation of Wettest Quarter    | mm   | –                        |
| Bio17         | Precipitation of Driest Quarter     | mm   | –                        |
| Bio18         | Precipitation of Warmest Quarter    | mm   | –                        |
| Bio19         | Precipitation of Coldest Quarter    | mm   | –                        |
| ALT           | Mean altitude                       | m    | 0.3                      |

**Table S3.** Geographical distribution and data sources of *C. glauca* population occurrences.

| Population Number | Longitude | Latitude | Reference |
|-------------------|-----------|----------|-----------|
| 1                 | 98.325    | 27.9806  | [1]       |
| 2                 | 98.6664   | 25.5278  | [1]       |
| 3                 | 98.85773  | 25.84192 | [1]       |
| 4                 | 99.28717  | 27.17717 | [1]       |
| 5                 | 99.70601  | 27.82308 | [1]       |
| 6                 | 100.0928  | 23.88034 | [1]       |
| 7                 | 100.2221  | 25.58423 | [1]       |
| 8                 | 100.2299  | 26.8761  | [1]       |
| 9                 | 100.7993  | 22.01089 | [1]       |
| 10                | 100.8607  | 22.69765 | [1]       |
| 11                | 101.5073  | 29.00034 | [1]       |
| 12                | 101.8551  | 26.68321 | [1]       |
| 13                | 101.8745  | 25.70455 | [1]       |
| 14                | 102.1143  | 24.69891 | [1]       |
| 15                | 102.1771  | 28.54981 | [1]       |
| 16                | 102.2346  | 29.91416 | [1]       |
| 17                | 102.35    | 29.22    | [1]       |
| 18                | 102.4049  | 25.53253 | [1]       |
| 19                | 102.75    | 30.06    | [1]       |
| 20                | 102.7717  | 28.96607 | [1]       |
| 21                | 102.81    | 30.36    | [1]       |
| 22                | 102.8467  | 29.79293 | [1]       |

---

|    |          |          |     |
|----|----------|----------|-----|
| 23 | 103.26   | 31.08    | [1] |
| 24 | 103.3986 | 29.49612 | [1] |
| 25 | 103.7    | 29.47    | [1] |
| 26 | 104.0109 | 28.67273 | [1] |
| 27 | 104.2    | 35.86    | [1] |
| 28 | 104.55   | 32.44    | [1] |
| 29 | 104.6723 | 23.43747 | [1] |
| 30 | 104.68   | 32.94    | [1] |
| 31 | 104.7028 | 23.12546 | [1] |
| 32 | 104.8959 | 25.08683 | [1] |
| 33 | 105.0553 | 24.04648 | [1] |
| 34 | 105.28   | 25.46    | [1] |
| 35 | 105.3347 | 24.68123 | [1] |
| 36 | 105.35   | 29.98    | [1] |
| 37 | 105.39   | 25.13    | [1] |
| 38 | 105.5248 | 32.28772 | [1] |
| 39 | 105.6309 | 23.62532 | [1] |
| 40 | 105.84   | 24.93    | [1] |
| 41 | 106      | 24.38    | [1] |
| 42 | 106.15   | 33.32    | [1] |
| 43 | 106.17   | 25.25    | [1] |
| 44 | 106.1995 | 29.58212 | [1] |
| 45 | 106.2    | 28.32    | [1] |
| 46 | 106.2887 | 23.1606  | [1] |
| 47 | 106.33   | 26.67    | [1] |
| 48 | 106.8256 | 28.13355 | [1] |
| 49 | 106.9091 | 27.65832 | [1] |
| 50 | 106.99   | 24.53    | [1] |
| 51 | 107.04   | 25       | [1] |
| 52 | 107.0993 | 29.15785 | [1] |
| 53 | 107.11   | 22.76    | [1] |
| 54 | 107.1841 | 23.62216 | [1] |
| 55 | 107.2871 | 29.68595 | [1] |
| 56 | 107.46   | 27.74    | [1] |
| 57 | 107.5097 | 25.10426 | [1] |
| 58 | 107.54   | 25.59    | [1] |
| 59 | 107.54   | 33.22    | [1] |
| 60 | 107.71   | 27.95    | [1] |
| 61 | 107.895  | 32.53669 | [1] |
| 62 | 107.958  | 22.09777 | [1] |
| 63 | 107.97   | 26.58    | [1] |
| 64 | 108.17   | 34.31    | [1] |
| 65 | 108.185  | 30.0234  | [1] |
| 66 | 108.3144 | 33.31033 | [1] |
| 67 | 108.4    | 27.99    | [1] |
| 68 | 108.45   | 26       | [1] |
| 69 | 108.62   | 31.82    | [1] |
| 70 | 108.8423 | 24.90595 | [1] |
| 71 | 108.85   | 27.69    | [1] |
| 72 | 108.93   | 30.29    | [1] |

---

---

|     |          |          |     |
|-----|----------|----------|-----|
| 73  | 109.15   | 29.67    | [1] |
| 74  | 109.2029 | 28.15407 | [1] |
| 75  | 109.36   | 32.38    | [1] |
| 76  | 109.41   | 31.05    | [1] |
| 77  | 109.48   | 29.99    | [1] |
| 78  | 109.62   | 31.37    | [1] |
| 79  | 109.6851 | 27.44341 | [1] |
| 80  | 109.72   | 30.6     | [1] |
| 81  | 109.75   | 30.03333 | [1] |
| 82  | 109.83   | 27.2     | [1] |
| 83  | 109.85   | 29       | [1] |
| 84  | 109.87   | 31.11    | [1] |
| 85  | 109.9265 | 25.03299 | [1] |
| 86  | 109.95   | 28.61    | [1] |
| 87  | 110.0505 | 25.25509 | [1] |
| 88  | 110.16   | 29.39    | [1] |
| 89  | 110.3258 | 28.66833 | [1] |
| 90  | 110.3408 | 31.04233 | [1] |
| 91  | 110.35   | 25.17    | [1] |
| 92  | 110.4    | 28.43333 | [1] |
| 93  | 110.4405 | 25.4051  | [1] |
| 94  | 110.57   | 27.06    | [1] |
| 95  | 110.58   | 25.6     | [1] |
| 96  | 110.5999 | 26.00537 | [1] |
| 97  | 110.63   | 26.72    | [1] |
| 98  | 110.78   | 31.33    | [1] |
| 99  | 110.8    | 24.6     | [1] |
| 100 | 110.85   | 26.43    | [1] |
| 101 | 111      | 25.89    | [1] |
| 102 | 111.02   | 29.69    | [1] |
| 103 | 111.13   | 29.42    | [1] |
| 104 | 111.2998 | 26.39755 | [1] |
| 105 | 111.57   | 25.18    | [1] |
| 106 | 111.6008 | 25.52644 | [1] |
| 107 | 111.6311 | 26.22189 | [1] |
| 108 | 111.84   | 33.04    | [1] |
| 109 | 111.8407 | 26.58012 | [1] |
| 110 | 111.9458 | 25.57098 | [1] |
| 111 | 112.03   | 33.96    | [1] |
| 112 | 112.3774 | 24.78074 | [1] |
| 113 | 112.8056 | 27.22152 | [1] |
| 114 | 112.9488 | 25.39996 | [1] |
| 115 | 113.18   | 24.81    | [1] |
| 116 | 113.2173 | 25.22845 | [1] |
| 117 | 113.4151 | 24.18605 | [1] |
| 118 | 113.4685 | 27.67032 | [1] |
| 119 | 113.6045 | 24.68273 | [1] |
| 120 | 113.77   | 25.12    | [1] |
| 121 | 113.8142 | 29.24358 | [1] |
| 122 | 113.9615 | 27.12767 | [1] |

---

---

|     |          |          |     |
|-----|----------|----------|-----|
| 123 | 113.9878 | 24.39905 | [1] |
| 124 | 114.08   | 32.1     | [1] |
| 125 | 114.14   | 24.83    | [1] |
| 126 | 114.24   | 26.94    | [1] |
| 127 | 114.26   | 23.37    | [1] |
| 128 | 114.3083 | 25.68188 | [1] |
| 129 | 114.35   | 25.39    | [1] |
| 130 | 114.371  | 28.52075 | [1] |
| 131 | 114.3814 | 30.56116 | [1] |
| 132 | 114.41   | 29.01    | [1] |
| 133 | 114.53   | 24.74    | [1] |
| 134 | 114.5372 | 25.7908  | [1] |
| 135 | 114.61   | 27.39    | [1] |
| 136 | 114.67   | 27.81    | [1] |
| 137 | 114.78   | 28.38    | [1] |
| 138 | 114.7898 | 24.91111 | [1] |
| 139 | 114.9    | 26.79    | [1] |
| 140 | 114.96   | 29.32    | [1] |
| 141 | 115.02   | 24.78    | [1] |
| 142 | 115.36   | 26.33    | [1] |
| 143 | 115.4    | 31.79    | [1] |
| 144 | 115.65   | 24.95    | [1] |
| 145 | 115.75   | 24.24    | [1] |
| 146 | 115.7859 | 29.59907 | [1] |
| 147 | 115.7861 | 25.60028 | [1] |
| 148 | 115.82   | 29.12    | [1] |
| 149 | 115.93   | 24.65    | [1] |
| 150 | 115.99   | 29.61    | [1] |
| 151 | 116.01   | 26.47    | [1] |
| 152 | 116.02   | 25.88    | [1] |
| 153 | 116.104  | 28.96582 | [1] |
| 154 | 116.2    | 30.91    | [1] |
| 155 | 116.22   | 27.54    | [1] |
| 156 | 116.32   | 26.83    | [1] |
| 157 | 116.3329 | 31.39269 | [1] |
| 158 | 116.34   | 26.32    | [1] |
| 159 | 116.3576 | 25.83361 | [1] |
| 160 | 116.5    | 30.76    | [1] |
| 161 | 116.52   | 27.21    | [1] |
| 162 | 116.59   | 28.23    | [1] |
| 163 | 116.62   | 24.33    | [1] |
| 164 | 116.7635 | 25.70788 | [1] |
| 165 | 116.91   | 30.96    | [1] |
| 166 | 117.02   | 30.09    | [1] |
| 167 | 117.1758 | 26.90018 | [1] |
| 168 | 117.2455 | 28.29252 | [1] |
| 169 | 117.28   | 28.98    | [1] |
| 170 | 117.31   | 24.7     | [1] |
| 171 | 117.37   | 29.53    | [1] |
| 172 | 117.4908 | 30.65993 | [1] |

---

---

|     |          |          |     |
|-----|----------|----------|-----|
| 173 | 117.57   | 28.94    | [1] |
| 174 | 117.759  | 27.84    | [1] |
| 175 | 117.86   | 29.24    | [1] |
| 176 | 118.03   | 27.75    | [1] |
| 177 | 118.12   | 27.33    | [1] |
| 178 | 118.1416 | 30.27294 | [1] |
| 179 | 118.17   | 26.63    | [1] |
| 180 | 118.18   | 29.78    | [1] |
| 181 | 118.19   | 28.43    | [1] |
| 182 | 118.24   | 28.67    | [1] |
| 183 | 118.2423 | 25.65709 | [1] |
| 184 | 118.2488 | 29.95584 | [1] |
| 185 | 118.41   | 29.13    | [1] |
| 186 | 118.4314 | 29.86616 | [1] |
| 187 | 118.7977 | 32.05565 | [1] |
| 188 | 118.802  | 25.8568  | [1] |
| 189 | 118.87   | 29.57    | [1] |
| 190 | 119.05   | 25.65    | [1] |
| 191 | 119.06   | 27.61    | [1] |
| 192 | 119.1418 | 28.07441 | [1] |
| 193 | 119.3064 | 26.07611 | [1] |
| 194 | 119.33   | 29.48    | [1] |
| 195 | 119.36   | 30.19    | [1] |
| 196 | 119.3808 | 31.42047 | [1] |
| 197 | 119.482  | 28.44914 | [1] |
| 198 | 119.63   | 27.97    | [1] |
| 199 | 119.73   | 28.78    | [1] |
| 200 | 119.8233 | 31.37502 | [1] |
| 201 | 119.91   | 28.45    | [1] |
| 202 | 119.93   | 27.56    | [1] |
| 203 | 120.17   | 30.27    | [1] |
| 204 | 120.18   | 23       | [1] |
| 205 | 120.2141 | 29.67902 | [1] |
| 206 | 120.23   | 23.33    | [1] |
| 207 | 120.37   | 27.64    | [1] |
| 208 | 120.4    | 22.9     | [1] |
| 209 | 120.4069 | 31.23702 | [1] |
| 210 | 120.46   | 22.65    | [1] |
| 211 | 120.47   | 27.82    | [1] |
| 212 | 120.4806 | 22.78556 | [1] |
| 213 | 120.508  | 23.26345 | [1] |
| 214 | 120.6047 | 23.85301 | [1] |
| 215 | 120.6175 | 22.41944 | [1] |
| 216 | 120.64   | 24.15    | [1] |
| 217 | 120.6658 | 22.30972 | [1] |
| 218 | 120.6667 | 22.96667 | [1] |
| 219 | 120.6707 | 23.57805 | [1] |
| 220 | 120.6742 | 22.54056 | [1] |
| 221 | 120.7133 | 24.30222 | [1] |
| 222 | 120.718  | 22.17003 | [1] |

---

---

|     |          |          |     |
|-----|----------|----------|-----|
| 223 | 120.7197 | 23.13627 | [1] |
| 224 | 120.7238 | 22.74492 | [1] |
| 225 | 120.7294 | 22.41554 | [1] |
| 226 | 120.7333 | 22       | [1] |
| 227 | 120.7333 | 24.18333 | [1] |
| 228 | 120.7522 | 22.63056 | [1] |
| 229 | 120.76   | 23.99559 | [1] |
| 230 | 120.7604 | 22.89928 | [1] |
| 231 | 120.7783 | 24.49226 | [1] |
| 232 | 120.783  | 23.68052 | [1] |
| 233 | 120.8119 | 23.0219  | [1] |
| 234 | 120.8123 | 22.77689 | [1] |
| 235 | 120.8217 | 24.25278 | [1] |
| 236 | 120.8292 | 22.17917 | [1] |
| 237 | 120.835  | 22.37583 | [1] |
| 238 | 120.8378 | 23.82084 | [1] |
| 239 | 120.84   | 23.26    | [1] |
| 240 | 120.8444 | 22.07778 | [1] |
| 241 | 120.853  | 23.95791 | [1] |
| 242 | 120.8591 | 23.4629  | [1] |
| 243 | 120.88   | 23.66    | [1] |
| 244 | 120.8847 | 24.44528 | [1] |
| 245 | 120.9025 | 24.05389 | [1] |
| 246 | 120.9306 | 24.58532 | [1] |
| 247 | 120.9333 | 24.33333 | [1] |
| 248 | 120.9496 | 23.85696 | [1] |
| 249 | 120.9613 | 24.19175 | [1] |
| 250 | 120.97   | 29.14    | [1] |
| 251 | 120.9762 | 22.86487 | [1] |
| 252 | 120.9833 | 24.475   | [1] |
| 253 | 121.0114 | 23.18167 | [1] |
| 254 | 121.0151 | 24.08875 | [1] |
| 255 | 121.02   | 28.25    | [1] |
| 256 | 121.0642 | 23.97611 | [1] |
| 257 | 121.07   | 22.89    | [1] |
| 258 | 121.0881 | 24.63583 | [1] |
| 259 | 121.0958 | 24.24528 | [1] |
| 260 | 121.1    | 24.5     | [1] |
| 261 | 121.1167 | 24.06667 | [1] |
| 262 | 121.1544 | 23.3675  | [1] |
| 263 | 121.1553 | 22.85739 | [1] |
| 264 | 121.1745 | 24.70442 | [1] |
| 265 | 121.1753 | 23.80415 | [1] |
| 266 | 121.2    | 24.25    | [1] |
| 267 | 121.2106 | 22.96722 | [1] |
| 268 | 121.2172 | 24.37917 | [1] |
| 269 | 121.2622 | 24.13417 | [1] |
| 270 | 121.2635 | 24.72659 | [1] |
| 271 | 121.2667 | 24.61667 | [1] |
| 272 | 121.2833 | 25.06667 | [1] |

---



---

|     |          |          |     |
|-----|----------|----------|-----|
| 273 | 121.3294 | 24.37528 | [1] |
| 274 | 121.3322 | 23.49722 | [1] |
| 275 | 121.35   | 24.81667 | [1] |
| 276 | 121.3528 | 24.68056 | [1] |
| 277 | 121.41   | 29.59    | [1] |
| 278 | 121.4117 | 24.07528 | [1] |
| 279 | 121.4167 | 25.01667 | [1] |
| 280 | 121.4167 | 25.13333 | [1] |
| 281 | 121.4637 | 24.20171 | [1] |
| 282 | 121.4983 | 24.44333 | [1] |
| 283 | 121.5056 | 25.02722 | [1] |
| 284 | 121.5181 | 25.15657 | [1] |
| 285 | 121.52   | 23.95    | [1] |
| 286 | 121.5269 | 24.82611 | [1] |
| 287 | 121.54   | 29.86    | [1] |
| 288 | 121.5564 | 24.63417 | [1] |
| 289 | 121.5597 | 24.92222 | [1] |
| 290 | 121.5683 | 24.17029 | [1] |
| 291 | 121.602  | 25.07888 | [1] |
| 292 | 121.6114 | 23.9925  | [1] |
| 293 | 121.625  | 24.44833 | [1] |
| 294 | 121.6278 | 29.98515 | [1] |
| 295 | 121.6506 | 24.93417 | [1] |
| 296 | 121.6792 | 24.59528 | [1] |
| 297 | 121.7281 | 25.09917 | [1] |
| 298 | 121.7369 | 24.32389 | [1] |
| 299 | 121.7383 | 24.42389 | [1] |
| 300 | 121.7889 | 24.84816 | [1] |
| 301 | 121.8323 | 25.08409 | [1] |
| 302 | 121.8497 | 24.953   | [1] |
| 303 | 110.19   | 25.18    | [2] |
| 304 | 116.16   | 31.2     | [2] |
| 305 | 118.07   | 30.15    | [2] |
| 306 | 118.3    | 29.43    | [2] |
| 307 | 118.48   | 32.05    | [2] |
| 308 | 119.49   | 31.22    | [2] |
| 309 | 109.72   | 32.32    | [3] |
| 310 | 118.74   | 31.89    | [3] |
| 311 | 119.57   | 32.01    | [3] |
| 312 | 121.34   | 30.74    | [3] |
| 313 | 118.28   | 29.72    | [4] |
| 314 | 119.2    | 31.95    | [4] |
| 315 | 109.7    | 29.07    | [5] |

---

## References

1. GBIF.org (24 July 2021) GBIF Occurrence Download. <https://doi.org/10.15468/dl.6d9maf>.
2. Cai, Y.; Wang, X. Anecoanatomical study on leaves of *Cyclobalanopsis glauca* populations in the eastern subtropical zone, China. *Acta Ecol Sinica* **1999**, *19*, 844-849.
3. Ni, J.; Song, Y. Climate and geographical distribution of dominants and companions of fagaceae for broadleaved forest in China. *J. East China Normal Univ. (Nat. Sci. Ed.)* **1997**, *2*, 100-107.

4. Chen, X.; Song, Y. Relationships between environmental factors and allozymic variation of *Cyclobalanopsis glauca* populations in east China. *J. Xiamen Univ. (Nat. Sci. Ed.)* **1997**, *36*, 774-780.
5. Huang, S.; Li, T.; Wen, S.; He, G.; Peng, Y. Study on growth rule and biomass distribution pattern of *Cyclobalanopsis glauca*. *J. Cent. South Univ. For. Tech. (Nat. Sci. Ed.)* **2017**, *37*, 57-62.
